# Supplementary material for: Reversible and hydrogen bonding-assisted piezochromic luminescence for solid-state tetraaryl-buta-1,3-diene
Source: Royal Society of Chemistry journal article supplement (doi:10.1039/c3cc42644k), 2013-01-01
Supplement: c3cc42644k.pdf [file c3cc42644k.pdf]

## Supplementary Information

# Reversible and hydrogen bonding-assisted piezochromic luminescence for solid-state tetraaryl-but-1,3-diene

Ting Han,<sup>a</sup> Yijia Zhang,<sup>a</sup> Xiao Feng,<sup>\*a,b</sup> Zhengguo Lin,<sup>b</sup> Bin Tong,<sup>a</sup>  
Jianbing Shi,<sup>a</sup> Junge Zhi<sup>b</sup> and Yuping Dong<sup>\*a</sup>

<sup>a</sup> College of Materials Science & Engineering, <sup>b</sup> College of Chemistry,  
Beijing Institute of Technology, 5 South Zhongguancun Street, Beijing,  
100081, China.

E-mail: fengxiao86@bit.edu.cn, chdongyp@bit.edu.cn

### Contents

**Section A. Materials and Methods**

**Section B. Synthetic Procedures**

**Section C. TGA Profile**

**Section D. Transmission Spectral Profiles**

**Section E. Photographs of Piezochromic Behavior of TABD-COOH**

**Section F. UV-vis Spectral Profiles**

**Section G. FT-IR Spectral Profiles**

**Section H. PXRD Patterns**

**Section I. DSC Profiles**

**Section J. Supporting References**

## Section A. Materials and Methods

Toluene, methanol and potassium carbonate aqueous solution were degassed prior to use. All other reagents and solvents were used as commercially purchased without further purification.  $\text{CuBr}_2$  and  $\text{PdCl}_2$  were purchased from Aladdin and Jiushan Chemical Company, respectively.  $\text{Pd}(\text{PPh}_3)_4$  and phenylacetylene were purchased from J&K Chemical Co..

$^1\text{H-NMR}$  spectra were recorded on a Varian mercury-plus 400 spectrometer. Fourier transform infrared (FT-IR) spectra were recorded on an IRPrestige-21 spectrophotometer. Matrix-assisted laser desorption ionization time-of-flight mass (MALDI-TOF MS) spectra were recorded on an Autoflex III MALDI-TOF spectrometer. UV-visible absorption spectra were measured by TU-1901 spectrophotometer. Fluorescence spectra were obtained using a F-7000 fluorescence spectrophotometer. The absolute quantum yield was determined by standard procedure with an integral sphere JASCO model ILF-533 mounted on the FP-6600 spectrofluorometer. Thermal gravimetric analysis (TGA) was performed on a Shimadzu TGA-50 thermal analyzer at a heating rate of  $10\text{ }^\circ\text{C}/\text{min}$  in nitrogen. Powder X-ray diffraction (PXRD) patterns were analyzed with monochromatized  $\text{Cu-K}\alpha$  ( $\lambda = 1.54178\text{ \AA}$ ) incident radiation by a Shimadzu XRD-6000 instrument operating at 40 kV voltage and 50 mA current. Differential scanning calorimetry (thermal analysis, DSC) was performed on a Shimadzu DSC-60 at a heating rate of  $10\text{ }^\circ\text{C}/\text{min}$ .

## Section B. Synthetic Procedures

(1Z,3Z)-1,4-dibromo-1,4-diphenylbuta-1,3-diene (DBDABD) was prepared via the PdCl<sub>2</sub>-catalyzed dimerization of phenylacetylene according to the references.<sup>1,2</sup>

### Preparation of dimethyl 4,4'-((1Z,3Z)-1,4-diphenylbuta-1,3-diene-1,4-diyl) dibenzoate (TABD-COOCH<sub>3</sub>).

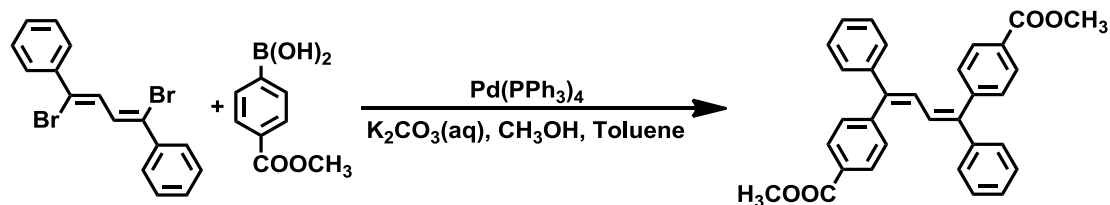

DBDABD (1.00 g, 2.75 mmol), 4-methoxycarbonylphenylboronic acid (1.48 g, 8.25 mmol) and Pd(PPh<sub>3</sub>)<sub>4</sub> (0.32 g, 0.23 mmol) were added to a three-necked flask. Under an atmosphere of argon, the mixed solvents of toluene (60 mL), methanol (20 mL) and potassium carbonate aqueous solution (2.0 mol/L, 16.50 mmol) were added and the mixture was stirred and refluxed for 24 h. After the reaction was finished, the product was extracted with CHCl<sub>3</sub> and washed with brine. The organic layer was combined and dried with MgSO<sub>4</sub>. The crude product was purified by flash column chromatography using dichloromethane/petroleum ether (1:1) as eluent. TABD-COOCH<sub>3</sub> was obtained as white solid, yield 95%. IR (KBr): 3029, 2941, 1716, 1275, 1100 cm<sup>-1</sup>; MALDI-TOF MS: *m/z* calcd. 474.55 for C<sub>32</sub>H<sub>26</sub>O<sub>4</sub>, found 474.4; <sup>1</sup>H NMR (400 MHz, CDCl<sub>3</sub>): δ = 8.10 (d, *J* = 8.2 Hz, 2H, Ar-H), 7.40 (d, *J* = 8.2 Hz, 2H, Ar-H), 7.25 (m, 3H, Ar-H), 7.12 (m, 2H, Ar-H), 6.75 (s, 1H, C=C-H), 3.96 (s, 3H, CH<sub>3</sub>).

### Preparation of 4,4'-((1Z,3Z)-1,4-diphenylbuta-1,3-diene-1,4-diyl)dibenzoic acid (TABD-COOH).

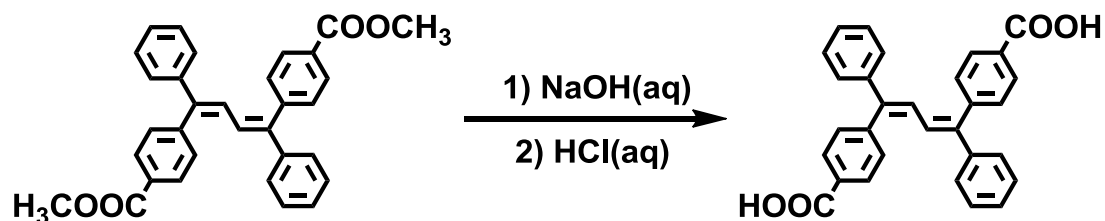

TABD-COOCH<sub>3</sub> (0.77 g, 1.62 mmol) and THF (50 mL) were added to a flask, the mixture was stirred at room temperature until the solid was completely dissolved in THF. Sodium hydroxide aqueous solution (1.25 mol/L, 32.4 mmol) was then added and the mixture was stirred and refluxed for 24 h. After the solution was concentrated under vacuum, HCl diluted solution (3 mol/L) was added dropwise until the pH value was less than 1 as monitored by pH test strips and further stirred for 2 h. After the precipitate was filtered off and washed with water, TABD-COOH was obtained as white solid, yield 98%. IR (KBr) 3432, 3019, 1690, 1422, 1205 cm<sup>-1</sup>; MALDI-TOF MS: calcd. 446.49 for C<sub>30</sub>H<sub>22</sub>O<sub>4</sub>, found 446.4; <sup>1</sup>H NMR (400 MHz, DMSO) δ = 12.54 (s, 1H, COOH), 8.05 (d, *J* = 7.2 Hz, 2H, Ar-H), 7.42 (d, *J* = 7.3 Hz, 2H, Ar-H), 7.30 (m, 3H, Ar-H), 7.08 (m, 2H, Ar-H), 6.66 (s, 1H, C=C-H).

### Section C. TGA Profile

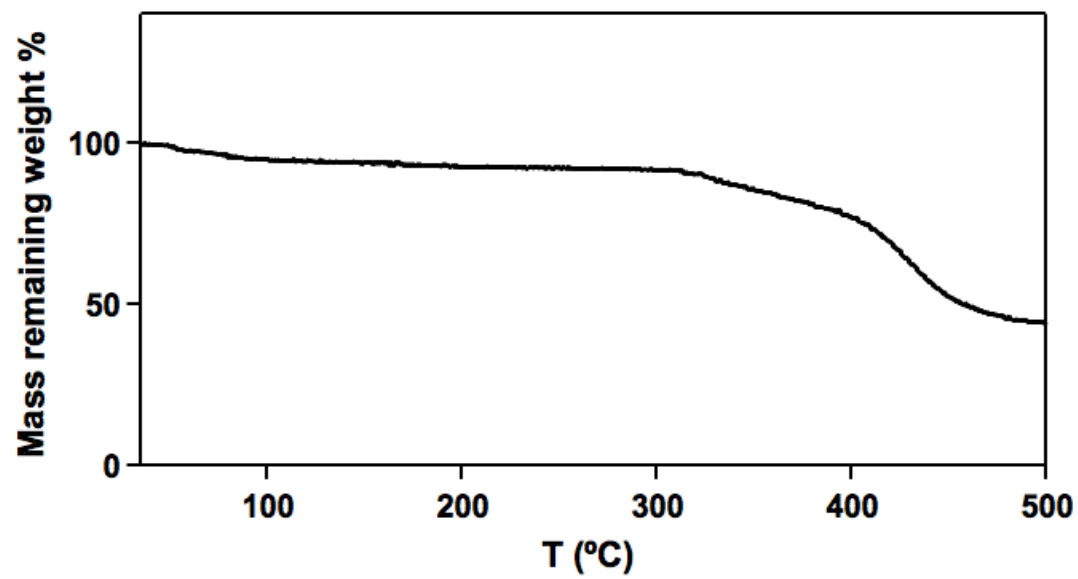

Fig. S1 TGA profile of TABD-COOH.

### Section D. Transmission Spectral Profiles

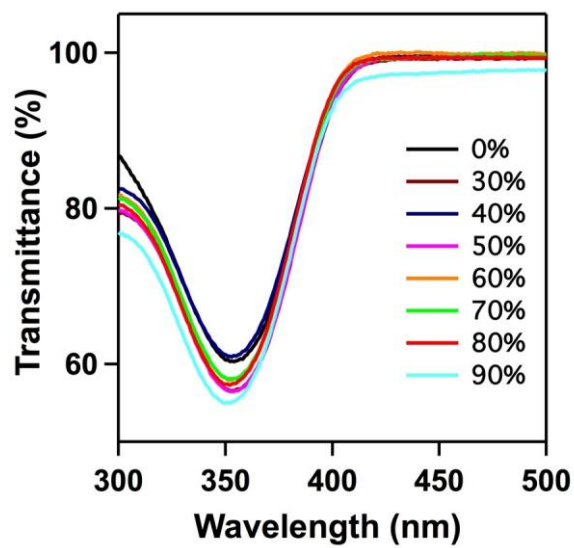

**Fig. S2** Transmission spectra of TABD-COOH in THF-hexane mixture with different  $f_H$ . TABD-COOH concentration: 10  $\mu$ M.

### Section E. Photographs of Piezochromic Behavior of TABD-COOH

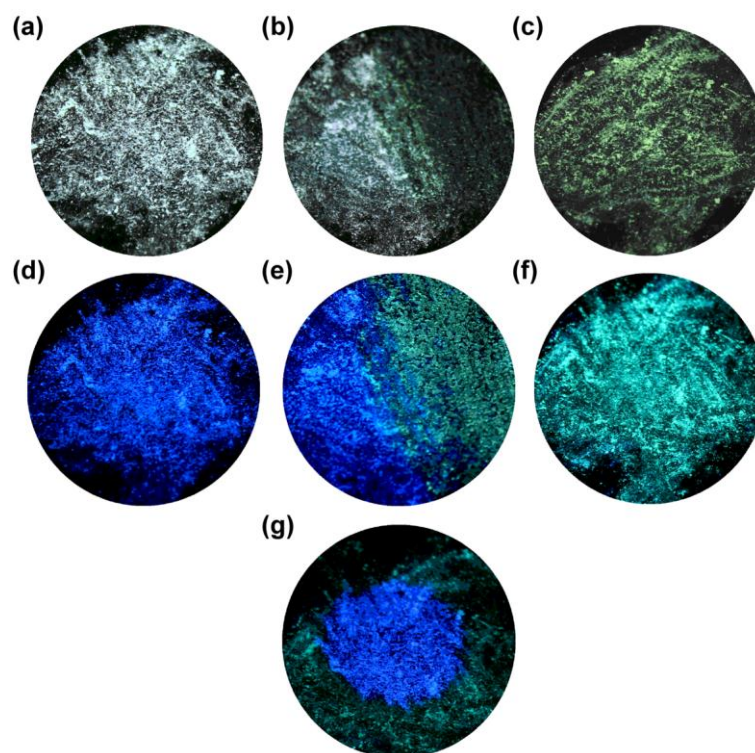

**Fig. S3** (a-c) Photographs of a) unground, b) half-ground and c) entire-ground powder of TABD-COOH under ambient light. (e-f) Photographs of corresponding powders under UV irradiation (365 nm). (g) Photograph of entire-ground sample after treatment with a drop of MeOH.

## Section F. UV-vis Spectral Profiles

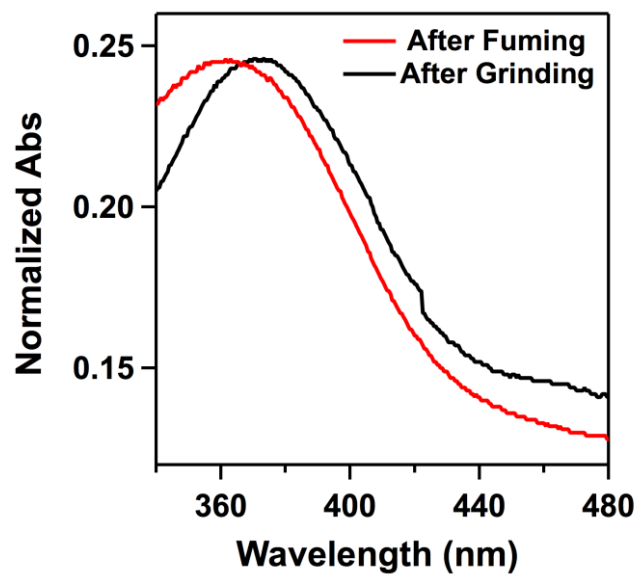

**Fig. S4** UV-vis spectra of fumed and ground TABD-COOH.



### Section G. FT IR Spectral Profiles

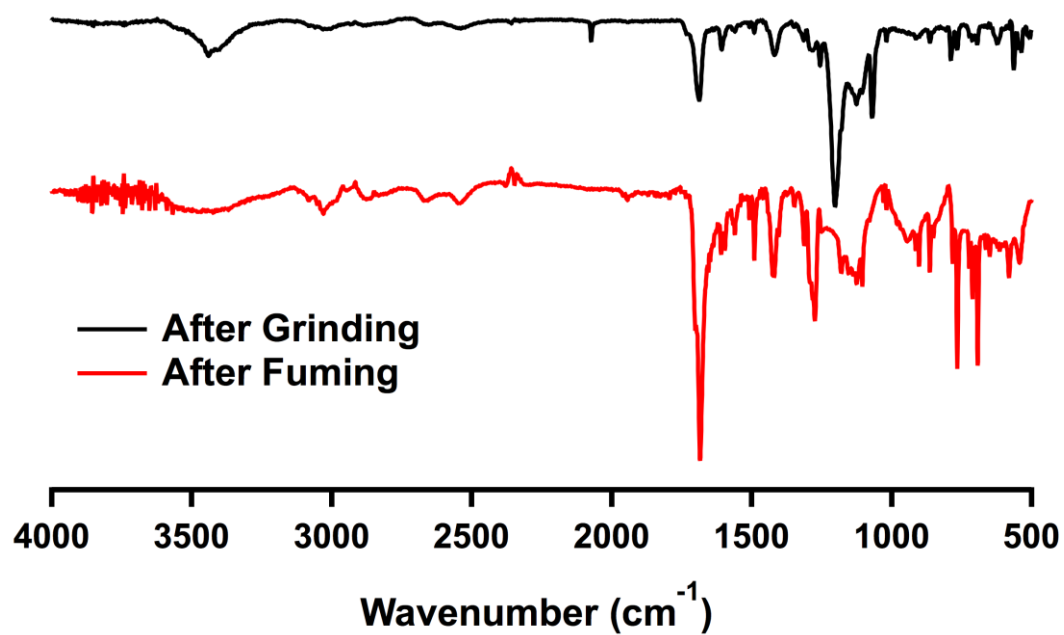

**Fig. S5** FT-IR spectra of fumed and ground TABD-COOH.

## Section H. PXRD Patterns

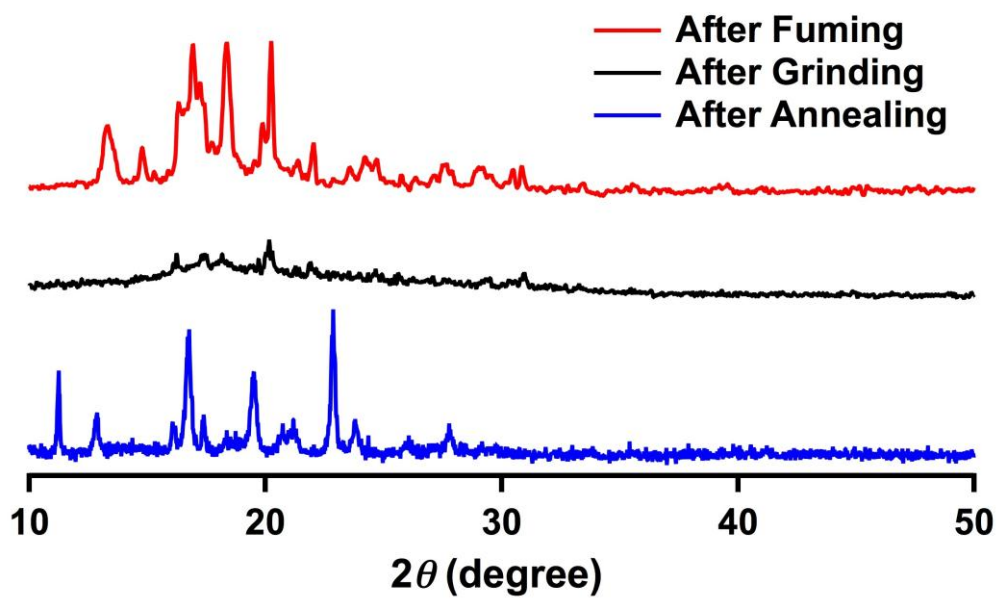

**Fig. S6** PXRD patterns of TABD-COOH after fuming, grinding and annealing.

### Section I. DSC Profiles

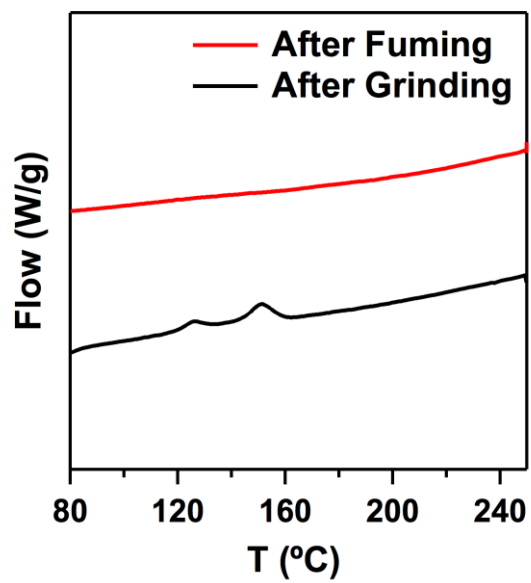

**Fig. S7** DSC profiles of fumed and ground TABD-COOH.

## Section J. Supporting References

1. J. H. Li, Y. Liang and Y. X. Xie, *J. Org. Chem.*, 2004, **69**, 8125.
2. Y. Liu, X. G. Chen, J. G. Qin, G. Yu and Y. Q. Liu, *Polymer*, 2010, **51**, 3730.
